# Supplementary material for: Micellization, surface activities and thermodynamics study of pyridinium-based ionic liquid surfactants in aqueous solution
Source: Royal Society of Chemistry journal article supplement (doi:10.1039/c9ra04226a), 2019-01-01
Supplement: c9ra04226a1.pdf [file c9ra04226a1.pdf]

## Electronic Supplementary Information

### Micellization, Surface Activities and Thermodynamics study of pyridinium-based ionic liquids surfactants in aqueous solution

Dong Fu<sup>1</sup>, Xiaoru Gao<sup>2</sup>, Bo Huang<sup>1</sup>, Jue Wang<sup>1</sup>, Yao Sun<sup>1</sup>, Weijun Zhang<sup>1</sup>, Kan Kan<sup>1\*</sup>, Xiaochen Zhang<sup>1\*</sup>, Yang Xie<sup>1</sup>, and Xin Sui<sup>1</sup>

1. Heilongjiang Academy of Sciences Institute of Advanced Technology, Harbin 150020, China.

2. Harbin FRP research Institute, Harbin, Heilongjiang 150029, China.

E-mail: kankan.has@foxmail.com; xc\_zhang.has@hotmail.com.

#### Characterizations of [C<sub>n</sub>mpy][Br]

n-dodecyl-3-methylpyridinium bromide ([C<sub>12</sub>mpy][Br])

The title compound was buff crystals. Yield: 94%. <sup>1</sup>H NMR (CDCl<sub>3</sub>, 400 MHz), δ: 9.490 (s, 1H), 9.304 (d, 1H), 8.266 (d, 1H), 8.034 (t, 1H), 4.929 (t, 2H), 2.633 (s, 3H), 2.035 (t, 2H), 1.487~1.103 (m, 18H), 0.842 (t, 3H); <sup>13</sup>C NMR (CDCl<sub>3</sub>, 100 MHz), δ: 145.58, 144.67, 142.31, 139.61, 61.79, 31.88, 29.57, 29.31, 26.10, 22.66, 18.72, 14.11. FTIR (KBr), ν/cm<sup>-1</sup>: 2996, 2919, 2842, 1641, 1514, 1456, 1379, 1286, 723, 682.

n-tetradecyl-3-methylpyridinium bromide ([C<sub>14</sub>mpy][Br])

The title compound was white crystals. Yield: 95%. <sup>1</sup>H NMR (CDCl<sub>3</sub>, 400 MHz), δ: 9.433 (s, 1H), 9.288 (d, 1H), 8.262 (d, 1H), 8.003 (t, 1H), 4.959 (t, 2H), 2.648 (s, 3H), 2.024 (t, 2H), 1.478~1.132 (m, 22H), 0.866 (t, 3H); <sup>13</sup>C NMR (CDCl<sub>3</sub>, 100 MHz), δ: 145.53, 144.66, 142.28, 139.63, 127.70, 61.79, 31.92, 29.68, 29.64, 29.60, 29.53, 29.36, 26.11, 22.69, 18.76, 14.13. FTIR (KBr), ν/cm<sup>-1</sup>: 3006, 2919, 2847, 1631, 1502, 1467, 1369, 1236, 728, 682.

n-hexadecyl-3-methylpyridinium bromide ([C<sub>16</sub>mpy][Br])

The title compound was white crystals. Yield: 95%. <sup>1</sup>H NMR (CDCl<sub>3</sub>, 400 MHz), δ: 9.475 (s, 1H), 9.299 (d, 1H), 8.264 (d, 1H), 8.031 (t, 1H), 4.934 (t, 2H), 2.634 (s, 3H), 2.015 (t, 2H), 1.438~1.009 (m, 26H), 0.848 (t, 3H); <sup>13</sup>C NMR (CDCl<sub>3</sub>, 100 MHz), δ: 145.56, 144.66, 142.31, 139.60, 127.77, 61.73, 32.04, 31.91, 29.68, 29.65, 29.61, 29.53, 29.37, 26.10, 22.68, 18.73, 14.12. FTIR (KBr), ν/cm<sup>-1</sup>: 3006, 2919, 2847, 1626, 1514, 1472, 1375, 1286, 718, 682.

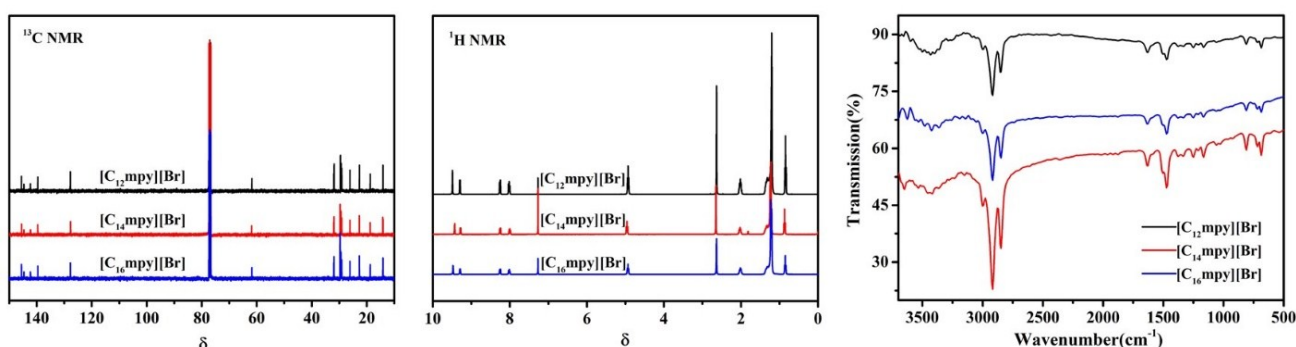

Fig. S1. (<sup>1</sup>H, <sup>13</sup>C) NMR and FTIR spectrum of synthesized [C<sub>n</sub>mpy][Br].

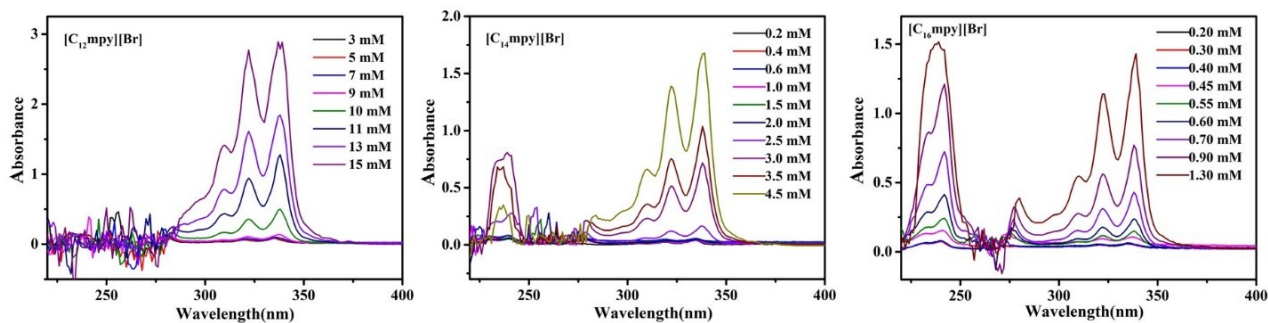

**Fig. S2.** The plots of absorption intensity vs. various concentrations of ILs solutions containing pyrene.

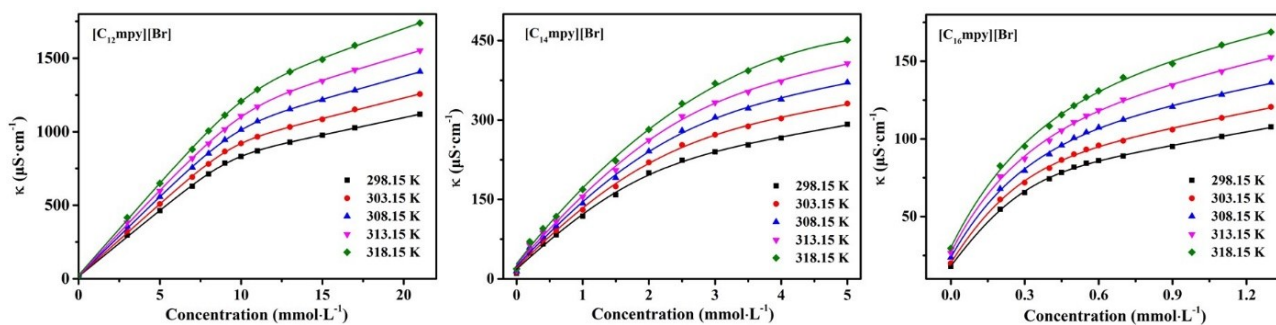

**Fig. S3.** Conductivity dependence of concentration for ILs in the presence of LiBr at different temperature.

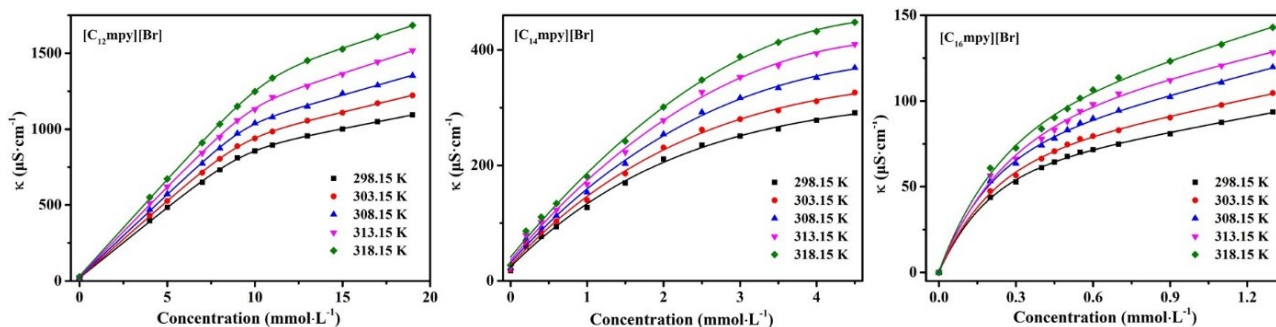

**Fig. S4.** Conductivity dependence of concentration for ILs in the presence of NaBr at different temperature.

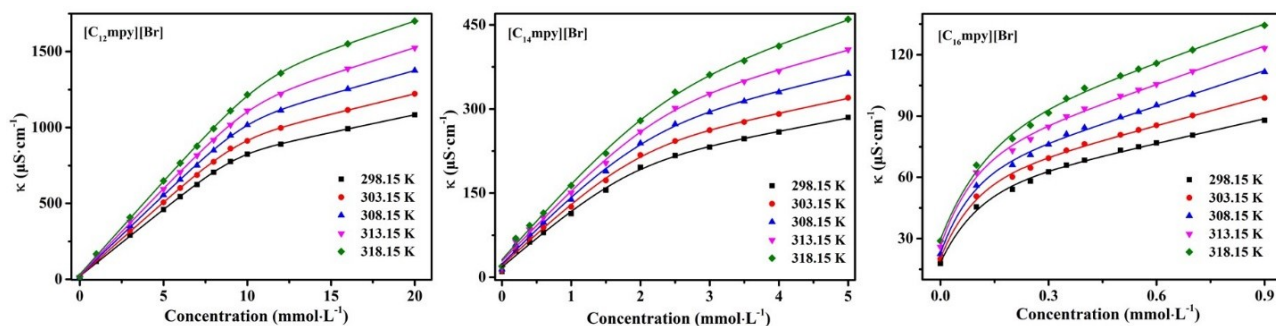

**Fig. S5.** Conductivity dependence of concentration for ILs in the presence of MgBr<sub>2</sub> at different temperature.

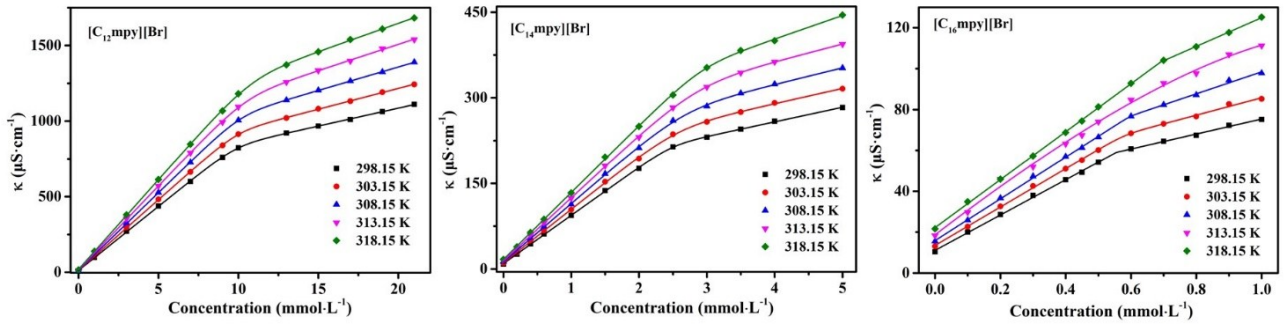

Fig. S6. Conductivity dependence of concentration for ILs in the presence of  $\text{C}_2\text{H}_5\text{OH}$  at different temperature.

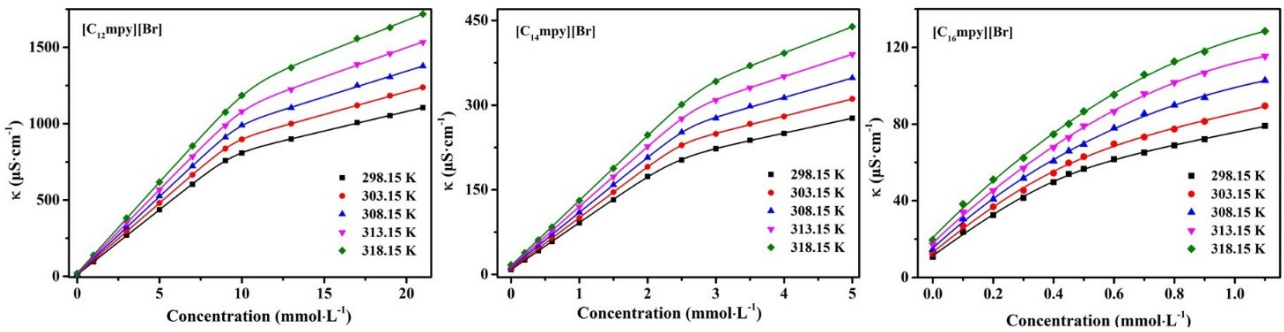

Fig. S7. Conductivity dependence of concentration for ILs in the presence of  $\text{C}_3\text{H}_7\text{OH}$  at different temperature.

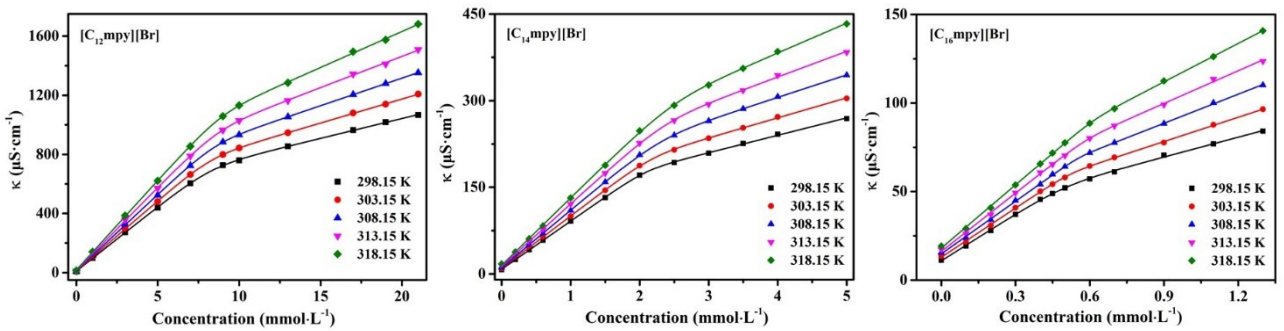

Fig. S8. Conductivity dependence of concentration for ILs in the presence of  $\text{C}_4\text{H}_9\text{OH}$  at different temperature.

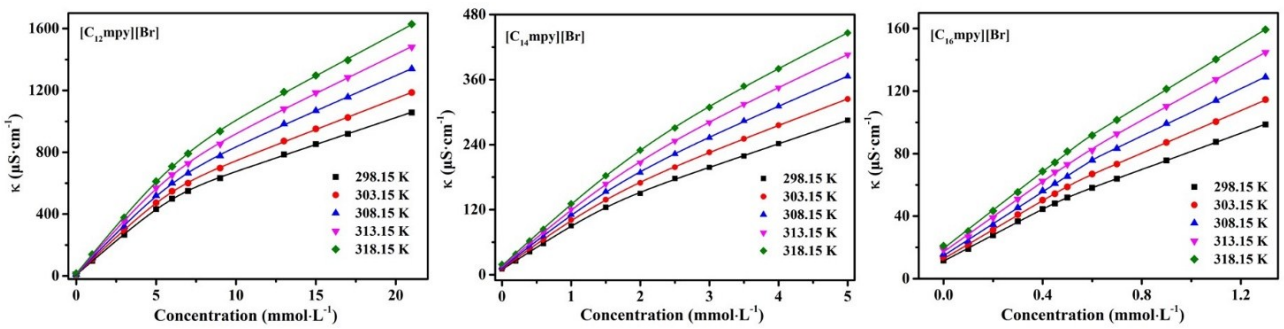

Fig. S9. Conductivity dependence of concentration for ILs in the presence of  $\text{C}_5\text{H}_{11}\text{OH}$  at different temperature.

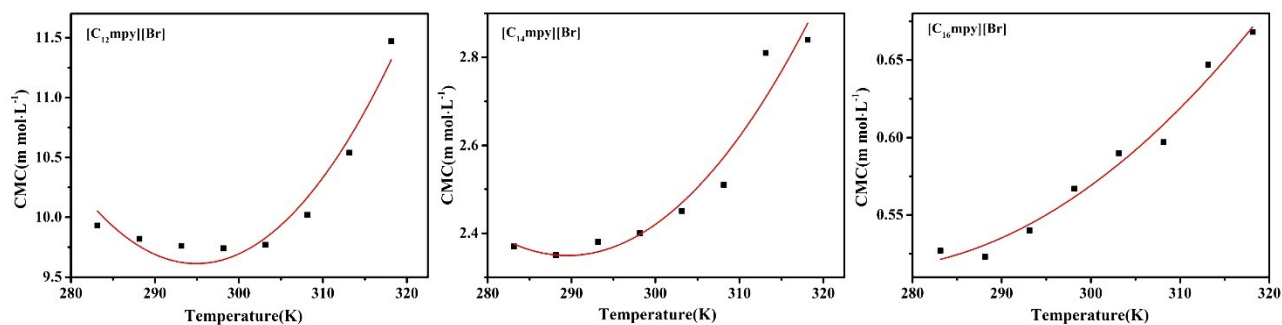

**Fig. S10.** The dependence of the CMC on temperature for ILs

**Table 1S.** Coefficients of polynomials  $\log X_{\text{CMC}} = A + BT + CT^2$ ; the temperature  $T^*$ (CMC), at the minimum critical micelle concentration,  $\text{cmc}^*$  and  $T_0$  at  $\Delta H_m^\ominus = 0$ .

|                           | A       | B       | C                      | CMC*  | $T^*$  | $T_0$  |
|---------------------------|---------|---------|------------------------|-------|--------|--------|
| [C <sub>12</sub> mpy][Br] | 7.57146 | -0.0761 | $1.302 \times 10^{-4}$ | 9.61  | 295.00 | 292.31 |
| [C <sub>14</sub> mpy][Br] | 4.36697 | -0.0606 | $1.048 \times 10^{-4}$ | 2.35  | 288.72 | 287.90 |
| [C <sub>16</sub> mpy][Br] | 1.54843 | -0.0276 | $4.857 \times 10^{-5}$ | 0.521 | 283.20 | 285.16 |

<sup>a</sup> Units:  $T$ (K);  $B$ (K<sup>-1</sup>);  $C$ (K<sup>-2</sup>);  $T^*$ ,  $T_0$ (K);  $\text{CMC}^*$ (mmol·L<sup>-1</sup>)
